# Supplementary material
Source: publisher figshare collection journal article supplement (https://frontiersin.figshare.com/ndownloader/files/15540242)
Supplement: Supplementary file 1 [file 15540242]

## Sheet: Sheet1
Serial number	Species	Stranding network	Sex	Included in Analysis Y/N	Reason if excluded from truncated cones	Number of girths available	Lengths missing so that girths not useable for TC? Y/N	Girth nuchal crest	Girth posterior to pectoral flipper	Girth cranial dorsal fin insertion	Girth caudal dorsal fin insertion	Girth anus	Girth midkeel	Total length	Snout to nuchal crest	Snout to pectoral flipper insertion	Max pectoral flipper width	Snout to cranial dorsal fin insertion	Snout to tip of dorsal fin	Snout to anus	Snout to midkeel	Fluke notch to anus	Fluke notch to insertion	Fluke to notch estimated Y/N	TCSA	TCV	Scaling vector	3DMSA	3DMV
RT102	Globicephala_macrorhynchus	UNCW	F	yes		6	yes	157	204	216	214	148	119	387	34	58	21	95	NA	261	326	140	31	NA	62494.3	810679	0.720021646510647,0.720021646510647,0.720021646510647,0.809347166293071,0.809347166293071,0.845209306693588,0.845209306693588,0.845209306693588,0.861742653039858,0.861742653039858,0.861742653039858,0.861742653039858,0.861742653039858,0.854681111547435,0.854681111547435,0.854681111547435,0.854681111547435,0.854645609347956,0.854645609347956,0.854645609347956,0.854645609347956,0.854645609347956	58650.2	687493
RT103	Globicephala_macrorhynchus	UNCW	F	yes		6	no	145	190	192	198	115	96	349	42	59	22	99	162	228	327	121	26	NA	51099.8	611456	0.664988144866521,0.664988144866521,0.664988144866521,0.753803733312174,0.753803733312174,0.751297161505412,0.751297161505412,0.751297161505412,0.797313295803233,0.797313295803233,0.797313295803233,0.797313295803233,0.797313295803233,0.664110323161858,0.664110323161858,0.664110323161858,0.664110323161858,0.689462004179863,0.689462004179863,0.689462004179863,0.689462004179863,0.689462004179863	46819	497935
RT105_2	Globicephala_macrorhynchus	UNCW	F	yes		6	no	155	210	209	204	144	104	375	34	62	20	98	173	251	328	86	24	NA	61248	804651	0.710849396236626,0.710849396236626,0.710849396236626,0.833151494713455,0.833151494713455,0.817818264347037,0.817818264347037,0.817818264347037,0.821474304766967,0.821474304766967,0.821474304766967,0.821474304766967,0.821474304766967,0.831581622046153,0.831581622046153,0.831581622046153,0.831581622046153,0.746917171194852,0.746917171194852,0.746917171194852,0.746917171194852,0.746917171194852	55583.1	636687
RT107	Globicephala_macrorhynchus	UNCW	F	yes		6	no	147	190	198	189	121	84.2	357	35	58	19	89	150	240	329	135	25	NA	51650.2	616582	0.674160395140542,0.674160395140542,0.674160395140542,0.753803733312174,0.753803733312174,0.774775197802456,0.774775197802456,0.774775197802456,0.761071782357631,0.761071782357631,0.761071782357631,0.761071782357631,0.761071782357631,0.698759557413781,0.698759557413781,0.698759557413781,0.698759557413781,0.604715632832755,0.604715632832755,0.604715632832755,0.604715632832755,0.604715632832755	47490.6	506232
RT19	Globicephala_macrorhynchus	UNCW	F	no	Girth at the eye is too small, the difference between girth at the eye and girth posterior to the pectoral flipper insertion was approximately 100cm, when the average for short-finned pilot whales is 50.6cm	6	yes	147	190	198	189	121	84.2	357	36	53	17	NA	NA	241	329	135	25	NA	NA	NA	NA	NA	NA
RT22	Globicephala_macrorhynchus	UNCW	F	yes		6	no	166	204	218	206	123.5	90	359.5	34	63	18.6	94	157	246	330	117	26	NA	57125.8	743153	0.761296772743741,0.761296772743741,0.761296772743741,0.809347166293071,0.809347166293071,0.853035318792603,0.853035318792603,0.853035318792603,0.829527974421545,0.829527974421545,0.829527974421545,0.829527974421545,0.829527974421545,0.713196738352083,0.713196738352083,0.713196738352083,0.713196738352083,0.646370628918622,0.646370628918622,0.646370628918622,0.646370628918622,0.646370628918622	51880	602561
RT24	Globicephala_macrorhynchus	UNCW	F	yes		6	no	142	173	184	195	110	94	330	34	61.5	16.5	91	153	215	331	73	24	NA	46905.5	540924	0.651229769455489,0.651229769455489,0.651229769455489,0.686358136121085,0.686358136121085,0.719993113109353,0.719993113109353,0.719993113109353,0.785232791321366,0.785232791321366,0.785232791321366,0.785232791321366,0.785232791321366,0.635235961285256,0.635235961285256,0.635235961285256,0.635235961285256,0.675098212426116,0.675098212426116,0.675098212426116,0.675098212426116,0.675098212426116	42959.4	440454
RT48	Globicephala_macrorhynchus	UNCW	F	yes		6	no	170	208	216	218	128	99.6	352	36	66.5	18.5	95.2	158	250.5	332	97	25.5	NA	58912.4	793187	0.779641273291783,0.779641273291783,0.779641273291783,0.825216718573327,0.825216718573327,0.845209306693588,0.845209306693588,0.845209306693588,0.877849992349014,0.877849992349014,0.877849992349014,0.877849992349014,0.877849992349014,0.739183664041025,0.739183664041025,0.739183664041025,0.739183664041025,0.715316829336608,0.715316829336608,0.715316829336608,0.715316829336608,0.715316829336608	52784.5	626725
RT49	Globicephala_macrorhynchus	UNCW	F	yes		6	no	132	188	197	215.4	127	81	375	36	58.5	18.5	100	172	251	333	123	24.5	NA	55970	708597	0.605368518085384,0.605368518085384,0.605368518085384,0.745868957172046,0.745868957172046,0.770862191752948,0.770862191752948,0.770862191752948,0.867380221798062,0.867380221798062,0.867380221798062,0.867380221798062,0.867380221798062,0.733408791665704,0.733408791665704,0.733408791665704,0.733408791665704,0.58173356602676,0.58173356602676,0.58173356602676,0.58173356602676,0.58173356602676	51426.5	574565
RT57	Globicephala_macrorhynchus	UNCW	M	yes		6	no	191	259	272	253	190	165	506	39	75	30	113	228	316	334	70	35	NA	106354	1.77134e+06	0.875949901169003,0.875949901169003,0.875949901169003,1.02755351014659,1.02755351014659,1.064337645466,1.064337645466,1.064337645466,1.01878921130413,1.01878921130413,1.01878921130413,1.01878921130413,1.01878921130413,1.0972257513109,1.0972257513109,1.0972257513109,1.0972257513109,1.18501281968414,1.18501281968414,1.18501281968414,1.18501281968414,1.18501281968414	96884.8	1.39237e+06
RT59	Globicephala_macrorhynchus	UNCW	M	no	Girth at the eye is too small, the difference between girth at the eye and girth posterior to the pectoral flipper insertion was approximately 100cm, when the average for short-finned pilot whales is 50.6cm	6	no	191	259	272	253	190	165	506		80.5	19	112	186	260	334	70	35	NA	NA	NA	NA	NA	NA
RT63	Globicephala_macrorhynchus	UNCW	F	yes		5	no	151	182	NA	181	116	100.5	359	32	59	18	87	158	241.5	335	122.5	22	NA	52200.3	602530	0.692504895688584,0.692504895688584,0.692504895688584,0.722064628751661,0.722064628751661,0.722064628751661,0.722064628751661,0.722064628751661,0.728857103739319,0.728857103739319,0.728857103739319,0.728857103739319,0.728857103739319,0.669885195537179,0.669885195537179,0.669885195537179,0.669885195537179,0.721780535625794,0.721780535625794,0.721780535625794,0.721780535625794,0.721780535625794	47590.3	483335
RT66	Globicephala_macrorhynchus	UNCW	F	yes		6	no	152	190	205	204	126	97	350	38	59	17	98	166	239	336	116	25	NA	54619.8	692674	0.697091020825594,0.697091020825594,0.697091020825594,0.753803733312174,0.753803733312174,0.802166240149007,0.802166240149007,0.802166240149007,0.821474304766967,0.821474304766967,0.821474304766967,0.821474304766967,0.821474304766967,0.727633919290384,0.727633919290384,0.727633919290384,0.727633919290384,0.696643900056737,0.696643900056737,0.696643900056737,0.696643900056737,0.696643900056737	49262.5	546608
RT68	Globicephala_macrorhynchus	UNCW	F	yes		6	no	180	179.5	188	184	127.5	100	334	35	57.9	17.5	94.5	163	231	337	95	27	NA	52255.2	640360	0.825502524661888,0.825502524661888,0.825502524661888,0.712146158576501,0.712146158576501,0.735645137307382,0.735645137307382,0.735645137307382,0.740937608221186,0.740937608221186,0.740937608221186,0.740937608221186,0.740937608221186,0.736296227853364,0.736296227853364,0.736296227853364,0.736296227853364,0.718189587687358,0.718189587687358,0.718189587687358,0.718189587687358,0.718189587687358	46111.8	489119
RT74	Globicephala_macrorhynchus	UNCW	F	yes		6	no	145	180	186	182	116	89	349	34	59	16	96	156	237	338	110	23	NA	49702.1	574229	0.664988144866521,0.664988144866521,0.664988144866521,0.714129852611533,0.714129852611533,0.727819125208368,0.727819125208368,0.727819125208368,0.732883938566608,0.732883938566608,0.732883938566608,0.732883938566608,0.732883938566608,0.669885195537179,0.669885195537179,0.669885195537179,0.669885195537179,0.639188733041748,0.639188733041748,0.639188733041748,0.639188733041748,0.639188733041748	45195.1	459402
CCSN02-183	Globicephala_melas	IFAW	M	yes		3	no	NA	272	298	NA	218	NA	558	NA	74	30	149	NA	340	NA	215	NA	46.655	137577	2.57119e+06	1.07912955505743,1.07912955505743,1.07912955505743,1.07912955505743,1.07912955505743,1.07912955505743,1.07912955505743,1.07912955505743,1.16607580275319,1.16607580275319,1.16607580275319,1.16607580275319,1.16607580275319,1.25892217781987,1.25892217781987,1.25892217781987,1.25892217781987,1.25892217781987,1.25892217781987,1.25892217781987,1.25892217781987,1.25892217781987	117497	1.87245e+06
CCSN02-187	Globicephala_melas	IFAW	F	yes		3	no	NA	218	241	NA	168	NA	446	NA	73	25	151	NA	283	NA	152	NA	32.984	88525.4	1.32892e+06	0.864890599273968,0.864890599273968,0.864890599273968,0.864890599273968,0.864890599273968,0.864890599273968,0.864890599273968,0.864890599273968,0.943034457931272,0.943034457931272,0.943034457931272,0.943034457931272,0.943034457931272,0.970178559053845,0.970178559053845,0.970178559053845,0.970178559053845,0.970178559053845,0.970178559053845,0.970178559053845,0.970178559053845,0.970178559053845	75337.8	962597
CCSN02-189	Globicephala_melas	IFAW	F	yes		3	no	NA	229	257	NA	168	NA	450	NA	70	22	152	NA	287	NA	170	NA	36.89	92138.7	1.44162e+06	0.908531868044673,0.908531868044673,0.908531868044673,0.908531868044673,0.908531868044673,0.908531868044673,0.908531868044673,0.908531868044673,1.00564255472339,1.00564255472339,1.00564255472339,1.00564255472339,1.00564255472339,0.970178559053845,0.970178559053845,0.970178559053845,0.970178559053845,0.970178559053845,0.970178559053845,0.970178559053845,0.970178559053845,0.970178559053845	78477.3	1.05458e+06
CCSN02-190	Globicephala_melas	IFAW	M	yes		3	no	NA	312	350	NA	234	NA	551	NA	71	32	166	NA	328	NA	218	NA	47.306	153911	3.22695e+06	1.23782507785999,1.23782507785999,1.23782507785999,1.23782507785999,1.23782507785999,1.23782507785999,1.23782507785999,1.23782507785999,1.36955211732757,1.36955211732757,1.36955211732757,1.36955211732757,1.36955211732757,1.351320135825,1.351320135825,1.351320135825,1.351320135825,1.351320135825,1.351320135825,1.351320135825,1.351320135825,1.351320135825	131671	2.4047e+06
CCSN02-191	Globicephala_melas	IFAW	F	yes		3	no	NA	208	241.2	NA	157.4	NA	403.9	NA	66	21.6	132	NA	261.6	NA	144.8	NA	31.4216	77095.7	1.11443e+06	0.825216718573327,0.825216718573327,0.825216718573327,0.825216718573327,0.825216718573327,0.825216718573327,0.825216718573327,0.825216718573327,0.943817059141173,0.943817059141173,0.943817059141173,0.943817059141173,0.943817059141173,0.908964911875448,0.908964911875448,0.908964911875448,0.908964911875448,0.908964911875448,0.908964911875448,0.908964911875448,0.908964911875448,0.908964911875448	65540.2	811798
CCSN02-198	Globicephala_melas	IFAW	F	yes		3	no	NA	223.5	233.7	NA	153.7	NA	423	NA	66	24	127	NA	278	NA	149.8	NA	32.5066	81079.1	1.18038e+06	0.88671123365932,0.88671123365932,0.88671123365932,0.88671123365932,0.88671123365932,0.88671123365932,0.88671123365932,0.88671123365932,0.914469513769868,0.914469513769868,0.914469513769868,0.914469513769868,0.914469513769868,0.887597884086762,0.887597884086762,0.887597884086762,0.887597884086762,0.887597884086762,0.887597884086762,0.887597884086762,0.887597884086762,0.887597884086762	69657.7	885297
CCSN02-205	Globicephala_melas	IFAW	F	yes		3	no	NA	213	233.7	NA	147.3	NA	443	NA	68.6	22.8	161.3	NA	284.5	NA	161.3	NA	35.0021	82241.2	1.18279e+06	0.845053658923648,0.845053658923648,0.845053658923648,0.845053658923648,0.845053658923648,0.845053658923648,0.845053658923648,0.845053658923648,0.914469513769868,0.914469513769868,0.914469513769868,0.914469513769868,0.914469513769868,0.850638700884711,0.850638700884711,0.850638700884711,0.850638700884711,0.850638700884711,0.850638700884711,0.850638700884711,0.850638700884711,0.850638700884711	70273	869569
CCSN02-207	Globicephala_melas	IFAW	F	yes		3	no	NA	216	232	NA	146	NA	385	NA	65	22	127	NA	257	NA	139	NA	30.163	72169.2	1.02466e+06	0.85695582313384,0.85695582313384,0.85695582313384,0.85695582313384,0.85695582313384,0.85695582313384,0.85695582313384,0.85695582313384,0.907817403485706,0.907817403485706,0.907817403485706,0.907817403485706,0.907817403485706,0.843131366796794,0.843131366796794,0.843131366796794,0.843131366796794,0.843131366796794,0.843131366796794,0.843131366796794,0.843131366796794,0.843131366796794	61504.5	760824
CCSN02-210	Globicephala_melas	IFAW	F	yes		3	no	NA	264.2	264.2	NA	172.7	NA	465	NA	73.6	22.8	167.6	NA	289.5	NA	177.8	NA	38.5826	102672	1.7256e+06	1.04818392811093,1.04818392811093,1.04818392811093,1.04818392811093,1.04818392811093,1.04818392811093,1.04818392811093,1.04818392811093,1.03381619827984,1.03381619827984,1.03381619827984,1.03381619827984,1.03381619827984,0.997320459217851,0.997320459217851,0.997320459217851,0.997320459217851,0.997320459217851,0.997320459217851,0.997320459217851,0.997320459217851,0.997320459217851	87757.2	1.29134e+06
CCSN02-212	Globicephala_melas	IFAW	M	yes		3	no	NA	312	332	NA	236	NA	599	NA	75	48	162	NA	296	NA	347	NA	75.299	155194	3.15215e+06	1.23782507785999,1.23782507785999,1.23782507785999,1.23782507785999,1.23782507785999,1.23782507785999,1.23782507785999,1.23782507785999,1.29911800843644,1.29911800843644,1.29911800843644,1.29911800843644,1.29911800843644,1.36286988057564,1.36286988057564,1.36286988057564,1.36286988057564,1.36286988057564,1.36286988057564,1.36286988057564,1.36286988057564,1.36286988057564	134930	2.42004e+06
CCSN02-213	Globicephala_melas	NMFS	F	yes		3	no	NA	210	236	NA	154	NA	414	NA	66	22	136	NA	261	NA	156	NA	33.852	52069.8	566423	0.833151494713455,0.833151494713455,0.833151494713455,0.833151494713455,0.833151494713455,0.833151494713455,0.833151494713455,0.833151494713455,0.923469427683735,0.923469427683735,0.923469427683735,0.923469427683735,0.923469427683735,0.889330345799358,0.889330345799358,0.889330345799358,0.889330345799358,0.889330345799358,0.889330345799358,0.889330345799358,0.889330345799358,0.889330345799358	66243.1	816751
CCSN02-219	Globicephala_melas	IFAW	F	yes		3	no	NA	228.6	203.2	NA	142.2	NA	399	NA	68.5	22.8	121.9	NA	247.4	NA	126.2	NA	27.3854	72704.7	994150	0.906944912816647,0.906944912816647,0.906944912816647,0.906944912816647,0.906944912816647,0.906944912816647,0.906944912816647,0.906944912816647,0.795122829259894,0.795122829259894,0.795122829259894,0.795122829259894,0.795122829259894,0.821186851770576,0.821186851770576,0.821186851770576,0.821186851770576,0.821186851770576,0.821186851770576,0.821186851770576,0.821186851770576,0.821186851770576	63239.6	773508
CCSN02-220	Globicephala_melas	IFAW	F	yes		3	no	NA	212	220	NA	150	NA	432	NA	64	25	144	NA	266	NA	157	NA	34.069	78571.8	1.09499e+06	0.841086270853584,0.841086270853584,0.841086270853584,0.841086270853584,0.841086270853584,0.841086270853584,0.841086270853584,0.841086270853584,0.860861330891618,0.860861330891618,0.860861330891618,0.860861330891618,0.860861330891618,0.866230856298076,0.866230856298076,0.866230856298076,0.866230856298076,0.866230856298076,0.866230856298076,0.866230856298076,0.866230856298076,0.866230856298076	67584.8	815427
CCSN02-221	Globicephala_melas	IFAW	F	yes		3	no	NA	222	236	NA	152	NA	431	NA	67	23	133	NA	268	NA	168	NA	36.456	81153.5	1.17577e+06	0.880760151554224,0.880760151554224,0.880760151554224,0.880760151554224,0.880760151554224,0.880760151554224,0.880760151554224,0.880760151554224,0.923469427683735,0.923469427683735,0.923469427683735,0.923469427683735,0.923469427683735,0.877780601048717,0.877780601048717,0.877780601048717,0.877780601048717,0.877780601048717,0.877780601048717,0.877780601048717,0.877780601048717,0.877780601048717	70122.6	891031
CCSN02-222	Globicephala_melas	IFAW	F	no	Girth at the caudal dorsal fin insertion is too large, the difference between girth posterior to the pectoral flipper insertion and girth at the caudal dorsal fin insertion was approximately 76cm, when the average for long-finned pilot whales is 25cm	3	no	NA	222	236	NA	153	NA	432	NA	61	23	135	NA	265	NA	156	NA	33.852	NA	NA	NA	NA	NA
CCSN02-225	Globicephala_melas	IFAW	M	yes		3	no	NA	264	299.8	NA	223.4	NA	569	NA	78.7	33	149.8	NA	360.7	NA	215.9	NA	46.8503	141197	2.65867e+06	1.04739045049692,1.04739045049692,1.04739045049692,1.04739045049692,1.04739045049692,1.04739045049692,1.04739045049692,1.04739045049692,1.1731192136423,1.1731192136423,1.1731192136423,1.1731192136423,1.1731192136423,1.2901064886466,1.2901064886466,1.2901064886466,1.2901064886466,1.2901064886466,1.2901064886466,1.2901064886466,1.2901064886466,1.2901064886466	119560	1.88732e+06
CCSN02-226	Globicephala_melas	IFAW	F	yes		3	no	NA	212	248	NA	148	NA	413	NA	60	25	134	NA	262	NA	154	NA	33.418	77627.7	1.12347e+06	0.841086270853584,0.841086270853584,0.841086270853584,0.841086270853584,0.841086270853584,0.841086270853584,0.841086270853584,0.841086270853584,0.970425500277823,0.970425500277823,0.970425500277823,0.970425500277823,0.970425500277823,0.854681111547435,0.854681111547435,0.854681111547435,0.854681111547435,0.854681111547435,0.854681111547435,0.854681111547435,0.854681111547435,0.854681111547435	66722.8	841843
CCSN02-227	Globicephala_melas	IFAW	F	no	Girth at the caudal dorsal fin insertion is too large, the difference between girth posterior to the pectoral flipper insertion and girth at the caudal dorsal fin insertion was approximately 100cm, when the average long-finned pilot whales is 25cm	3	no	NA	212	248	NA	149	NA	414	NA	66	22.8	133.4	NA	269.2	NA	154.9	NA	33.6133	NA	NA	NA	NA	NA
CCSN02-229	Globicephala_melas	IFAW	M	yes		3	no	NA	309.8	335.3	NA	243.8	NA	597	NA	85.1	45.7	153.9	NA	358.1	NA	228.6	NA	49.6062	165880	3.45939e+06	1.22909682410585,1.22909682410585,1.22909682410585,1.22909682410585,1.22909682410585,1.22909682410585,1.22909682410585,1.22909682410585,1.31203092839982,1.31203092839982,1.31203092839982,1.31203092839982,1.31203092839982,1.40791388510314,1.40791388510314,1.40791388510314,1.40791388510314,1.40791388510314,1.40791388510314,1.40791388510314,1.40791388510314,1.40791388510314	142204	2.56066e+06
CCSN03-106Gm	Globicephala_melas	IFAW	F	no	Fluke notch to insertion and anus to notch measurement missing, therefore snout to fluke insertion could not be estimated	3	no	NA	210	244	NA	138	NA	420	NA	60	29	138	NA	265	NA	NA	NA	NA	NA	NA	NA	NA	NA
CCSN05-270Gm	Globicephala_melas	IFAW	F	yes		3	no	NA	194	209	NA	145	NA	366.5	NA	61.5	22	118	NA	240.5	NA	126	NA	27.342	63898.2	835399	0.76967328559243,0.76967328559243,0.76967328559243,0.76967328559243,0.76967328559243,0.76967328559243,0.76967328559243,0.76967328559243,0.817818264347037,0.817818264347037,0.817818264347037,0.817818264347037,0.817818264347037,0.837356494421473,0.837356494421473,0.837356494421473,0.837356494421473,0.837356494421473,0.837356494421473,0.837356494421473,0.837356494421473,0.837356494421473	54282.5	608225
CCSN05-271Gm	Globicephala_melas	IFAW	F	yes		3	no	NA	270	294	NA	198	NA	475	NA	75	27	147	NA	296	NA	182	NA	39.494	113665	2.03854e+06	1.0711947789173,1.0711947789173,1.0711947789173,1.0711947789173,1.0711947789173,1.0711947789173,1.0711947789173,1.0711947789173,1.15042377855516,1.15042377855516,1.15042377855516,1.15042377855516,1.15042377855516,1.14342473031346,1.14342473031346,1.14342473031346,1.14342473031346,1.14342473031346,1.14342473031346,1.14342473031346,1.14342473031346,1.14342473031346	97009.2	1.51333e+06
CCSN05-273Gm	Globicephala_melas	IFAW	F	yes		3	no	NA	244	280	NA	176	NA	446	NA	60	0	135	NA	282	NA	180	NA	39.06	97267.2	1.62122e+06	0.968042689095634,0.968042689095634,0.968042689095634,0.968042689095634,0.968042689095634,0.968042689095634,0.968042689095634,0.968042689095634,1.09564169386206,1.09564169386206,1.09564169386206,1.09564169386206,1.09564169386206,1.01637753805641,1.01637753805641,1.01637753805641,1.01637753805641,1.01637753805641,1.01637753805641,1.01637753805641,1.01637753805641,1.01637753805641	82764.4	1.19133e+06
CCSN05-274Gm	Globicephala_melas	IFAW	F	yes		3	no	NA	228	280	NA	168	NA	465	NA	65	25	147	NA	295	NA	185	NA	40.145	96739.8	1.56088e+06	0.904564479974609,0.904564479974609,0.904564479974609,0.904564479974609,0.904564479974609,0.904564479974609,0.904564479974609,0.904564479974609,1.09564169386206,1.09564169386206,1.09564169386206,1.09564169386206,1.09564169386206,0.970178559053845,0.970178559053845,0.970178559053845,0.970178559053845,0.970178559053845,0.970178559053845,0.970178559053845,0.970178559053845,0.970178559053845	82737.8	1.15069e+06
CCSN05-280Gm	Globicephala_melas	IFAW	F	yes		3	no	NA	240	268	NA	190	NA	442.5	NA	54.5	26	125	NA	283.5	NA	159	NA	34.503	98198	1.62316e+06	0.952173136815378,0.952173136815378,0.952173136815378,0.952173136815378,0.952173136815378,0.952173136815378,0.952173136815378,0.952173136815378,1.04868562126797,1.04868562126797,1.04868562126797,1.04868562126797,1.04868562126797,1.0972257513109,1.0972257513109,1.0972257513109,1.0972257513109,1.0972257513109,1.0972257513109,1.0972257513109,1.0972257513109,1.0972257513109	82107.4	1.17249e+06
CCSN05-284Gm	Globicephala_melas	IFAW	F	yes		3	no	NA	231.2	247.6	NA	147.2	NA	447	NA	63.5	26	144.8	NA	286.4	NA	162.6	NA	35.2842	86499.7	1.29764e+06	0.917260121798814,0.917260121798814,0.917260121798814,0.917260121798814,0.917260121798814,0.917260121798814,0.917260121798814,0.917260121798814,0.968860297858021,0.968860297858021,0.968860297858021,0.968860297858021,0.968860297858021,0.850061213647178,0.850061213647178,0.850061213647178,0.850061213647178,0.850061213647178,0.850061213647178,0.850061213647178,0.850061213647178,0.850061213647178	74875.3	991386
CCSN05-294Gm	Globicephala_melas	IFAW	F	yes		3	no	NA	244	274	NA	182	NA	473	NA	59	31	141	NA	295	NA	175	NA	37.975	103355	1.71374e+06	0.968042689095634,0.968042689095634,0.968042689095634,0.968042689095634,0.968042689095634,0.968042689095634,0.968042689095634,0.968042689095634,1.07216365756501,1.07216365756501,1.07216365756501,1.07216365756501,1.07216365756501,1.05102677230833,1.05102677230833,1.05102677230833,1.05102677230833,1.05102677230833,1.05102677230833,1.05102677230833,1.05102677230833,1.05102677230833	88526.5	1.26869e+06
CCSN05-295Gm	Globicephala_melas	IFAW	F	yes		3	no	NA	202	238	NA	152	NA	452	NA	68	26	139	NA	295	NA	158	NA	34.286	83243	1.18425e+06	0.801412390152943,0.801412390152943,0.801412390152943,0.801412390152943,0.801412390152943,0.801412390152943,0.801412390152943,0.801412390152943,0.93129543978275,0.93129543978275,0.93129543978275,0.93129543978275,0.93129543978275,0.877780601048717,0.877780601048717,0.877780601048717,0.877780601048717,0.877780601048717,0.877780601048717,0.877780601048717,0.877780601048717,0.877780601048717	71312.1	866909
CCSN05-301Gm	Globicephala_melas	IFAW	F	yes		3	no	NA	238.75	272	NA	188	NA	467.5	NA	73.5	28	142.25	NA	285.5	NA	170	NA	36.89	102447	1.69006e+06	0.947213901727798,0.947213901727798,0.947213901727798,0.947213901727798,0.947213901727798,0.947213901727798,0.947213901727798,0.947213901727798,1.064337645466,1.064337645466,1.064337645466,1.064337645466,1.064337645466,1.08567600656026,1.08567600656026,1.08567600656026,1.08567600656026,1.08567600656026,1.08567600656026,1.08567600656026,1.08567600656026,1.08567600656026	87499	1.23914e+06
CCSN05-302Gm	Globicephala_melas	IFAW	M	yes		3	no	NA	223.5	264	NA	167.5	NA	470	NA	61	23	132	NA	305	NA	172.75	NA	37.4868	95616.8	1.49757e+06	0.88671123365932,0.88671123365932,0.88671123365932,0.88671123365932,0.88671123365932,0.88671123365932,0.88671123365932,0.88671123365932,1.03303359706994,1.03303359706994,1.03303359706994,1.03303359706994,1.03303359706994,0.967291122866185,0.967291122866185,0.967291122866185,0.967291122866185,0.967291122866185,0.967291122866185,0.967291122866185,0.967291122866185,0.967291122866185	81815.2	1.09934e+06
CCSN05-303Gm	Globicephala_melas	IFAW	M	yes		3	no	NA	304	332	NA	239	NA	573	NA	70	33.5	160	NA	352	NA	221	NA	47.957	157722	3.25909e+06	1.20608597329948,1.20608597329948,1.20608597329948,1.20608597329948,1.20608597329948,1.20608597329948,1.20608597329948,1.20608597329948,1.29911800843644,1.29911800843644,1.29911800843644,1.29911800843644,1.29911800843644,1.3801944977016,1.3801944977016,1.3801944977016,1.3801944977016,1.3801944977016,1.3801944977016,1.3801944977016,1.3801944977016,1.3801944977016	134253	2.37829e+06
IFAW09-146Gm	Globicephala_melas	IFAW	F	yes		3	no	NA	240	270	NA	160	NA	426	NA	57	27	125	NA	265	NA	155	NA	33.635	88019.3	1.38311e+06	0.952173136815378,0.952173136815378,0.952173136815378,0.952173136815378,0.952173136815378,0.952173136815378,0.952173136815378,0.952173136815378,1.05651163336699,1.05651163336699,1.05651163336699,1.05651163336699,1.05651163336699,0.923979580051281,0.923979580051281,0.923979580051281,0.923979580051281,0.923979580051281,0.923979580051281,0.923979580051281,0.923979580051281,0.923979580051281	76385.4	1.06848e+06
IFAW13-041Gm	Globicephala_melas	IFAW	F	no	Girth at the anus is too small, the difference between girth posterior to the pectoral flipper insertion and girth at the anus was approximately 142cm, when the average long-finned pilot whales is 68cm	3	no	NA	240	270	NA	161	NA	427	NA	53	26.5	125	NA	280	NA	158.5	NA	34.3945	NA	NA	NA	NA	NA
500196	Globicephala_macrorhynchus	Smithsonian	F	yes		5	no	170	222	242	NA	154	60	386	34	60	20	NA	NA	265	325.5	NA	27	NA	61022.5	809271	0.779641273291783,0.779641273291783,0.779641273291783,0.880760151554224,0.880760151554224,0.946947463980779,0.946947463980779,0.946947463980779,0.946947463980779,0.946947463980779,0.946947463980779,0.889330345799358,0.889330345799358,0.889330345799358,0.889330345799358,0.889330345799358,0.889330345799358,0.889330345799358,0.889330345799358,0.889330345799358,0.889330345799358,0.889330345799358	63781.2	813094
500197	Globicephala_macrorhynchus	Smithsonian	F	yes		4	no	152	180	178	NA	102	NA	325	25	56	16	NA	NA	212	NA	NA	21	NA	43111.4	443370	0.697091020825594,0.697091020825594,0.697091020825594,0.714129852611533,0.714129852611533,0.696515076812309,0.696515076812309,0.696515076812309,0.696515076812309,0.696515076812309,0.696515076812309,0.589036982282692,0.589036982282692,0.589036982282692,0.589036982282692,0.589036982282692,0.589036982282692,0.589036982282692,0.589036982282692,0.589036982282692,0.589036982282692,0.589036982282692	39846.3	387063
500198	Globicephala_macrorhynchus	Smithsonian	F	yes		4	no	162	200	210	NA	116	NA	336	36	61	12	NA	NA	226	NA	NA	21	NA	50147.7	571405	0.742952272195699,0.742952272195699,0.742952272195699,0.793477614012815,0.793477614012815,0.821731270396544,0.821731270396544,0.821731270396544,0.821731270396544,0.821731270396544,0.821731270396544,0.669885195537179,0.669885195537179,0.669885195537179,0.669885195537179,0.669885195537179,0.669885195537179,0.669885195537179,0.669885195537179,0.669885195537179,0.669885195537179,0.669885195537179	47084.2	521609
500200	Globicephala_macrorhynchus	Smithsonian	M	yes		4	yes	226	298	322	NA	226	NA	535	45	67	27	NA	NA	348	NA	NA	40	NA	131751	2.44594e+06	1.03646428096437,1.03646428096437,1.03646428096437,1.18228164487909,1.18228164487909,1.25998794794137,1.25998794794137,1.25998794794137,1.25998794794137,1.25998794794137,1.25998794794137,1.30512115682243,1.30512115682243,1.30512115682243,1.30512115682243,1.30512115682243,1.30512115682243,1.30512115682243,1.30512115682243,1.30512115682243,1.30512115682243,1.30512115682243	121540	2.10226e+06
500201	Globicephala_macrorhynchus	Smithsonian	F	yes		4	yes	182	220	246	NA	150	NA	392	40	66	20	NA	NA	266	NA	NA	25	NA	69329.7	921323	0.834674774935909,0.834674774935909,0.834674774935909,0.872825375414096,0.872825375414096,0.962599488178809,0.962599488178809,0.962599488178809,0.962599488178809,0.962599488178809,0.962599488178809,0.866230856298076,0.866230856298076,0.866230856298076,0.866230856298076,0.866230856298076,0.866230856298076,0.866230856298076,0.866230856298076,0.866230856298076,0.866230856298076,0.866230856298076	65652.5	848444
500202	Globicephala_macrorhynchus	Smithsonian	F	yes		4	yes	156	202	206	NA	138	NA	351	31	57	17	NA	NA	235	NA	NA	25	NA	55996.9	678798	0.715435521373636,0.715435521373636,0.715435521373636,0.801412390152943,0.801412390152943,0.806079246198515,0.806079246198515,0.806079246198515,0.806079246198515,0.806079246198515,0.806079246198515,0.79693238779423,0.79693238779423,0.79693238779423,0.79693238779423,0.79693238779423,0.79693238779423,0.79693238779423,0.79693238779423,0.79693238779423,0.79693238779423,0.79693238779423	51140	570869
500203	Globicephala_macrorhynchus	Smithsonian	F	yes		4	yes	176	216	232	NA	142	NA	378	38	60	20	NA	NA	259	NA	NA	25	NA	64307.7	826616	0.807158024113846,0.807158024113846,0.807158024113846,0.85695582313384,0.85695582313384,0.907817403485706,0.907817403485706,0.907817403485706,0.907817403485706,0.907817403485706,0.907817403485706,0.820031877295512,0.820031877295512,0.820031877295512,0.820031877295512,0.820031877295512,0.820031877295512,0.820031877295512,0.820031877295512,0.820031877295512,0.820031877295512,0.820031877295512	60073.7	739540
500204	Globicephala_macrorhynchus	Smithsonian	F	yes		4	yes	182	232	248	NA	140	NA	384	39	58	20	NA	NA	250	NA	NA	27	NA	66392.5	874157	0.834674774935909,0.834674774935909,0.834674774935909,0.920434032254865,0.920434032254865,0.970425500277823,0.970425500277823,0.970425500277823,0.970425500277823,0.970425500277823,0.970425500277823,0.808482132544871,0.808482132544871,0.808482132544871,0.808482132544871,0.808482132544871,0.808482132544871,0.808482132544871,0.808482132544871,0.808482132544871,0.808482132544871,0.808482132544871	62885.9	815097
500207	Globicephala_macrorhynchus	Smithsonian	M	yes		4	yes	204	266	280	NA	192	NA	488	39	76	25	NA	NA	321	NA	NA	35	NA	104741	1.71124e+06	0.93556952795014,0.93556952795014,0.93556952795014,1.05532522663704,1.05532522663704,1.09564169386206,1.09564169386206,1.09564169386206,1.09564169386206,1.09564169386206,1.09564169386206,1.10877549606154,1.10877549606154,1.10877549606154,1.10877549606154,1.10877549606154,1.10877549606154,1.10877549606154,1.10877549606154,1.10877549606154,1.10877549606154,1.10877549606154	96455.8	147759
500208	Globicephala_macrorhynchus	Smithsonian	M	yes		4	yes	200	270	290	NA	186	NA	481	40	68	25	NA	NA	307	NA	NA	31	NA	102238	1.64484e+06	0.917225027402098,0.917225027402098,0.917225027402098,1.0711947789173,1.0711947789173,1.13477175435713,1.13477175435713,1.13477175435713,1.13477175435713,1.13477175435713,1.13477175435713,1.07412626180961,1.07412626180961,1.07412626180961,1.07412626180961,1.07412626180961,1.07412626180961,1.07412626180961,1.07412626180961,1.07412626180961,1.07412626180961,1.07412626180961	95759.3	1.46714e+06
500226	Globicephala_macrorhynchus	Smithsonian	F	yes		4	yes	146	178	192	NA	110	NA	326	32	53	17	NA	NA	220	NA	NA	20	NA	44413.1	461779	0.669574270003531,0.669574270003531,0.669574270003531,0.706195076471405,0.706195076471405,0.751297161505412,0.751297161505412,0.751297161505412,0.751297161505412,0.751297161505412,0.751297161505412,0.635235961285256,0.635235961285256,0.635235961285256,0.635235961285256,0.635235961285256,0.635235961285256,0.635235961285256,0.635235961285256,0.635235961285256,0.635235961285256,0.635235961285256	42028	425523
500228	Globicephala_macrorhynchus	Smithsonian	F	yes		4	yes	164	210	216	NA	110	NA	320	30	53	17	NA	NA	214	NA	NA	21	NA	47787.9	549044	0.75212452246972,0.75212452246972,0.75212452246972,0.833151494713455,0.833151494713455,0.845209306693588,0.845209306693588,0.845209306693588,0.845209306693588,0.845209306693588,0.845209306693588,0.635235961285256,0.635235961285256,0.635235961285256,0.635235961285256,0.635235961285256,0.635235961285256,0.635235961285256,0.635235961285256,0.635235961285256,0.635235961285256,0.635235961285256	44889.6	506981
500229	Globicephala_macrorhynchus	Smithsonian	F	no	Girth at the caudal dorsal fin insertion is too large, the difference between girth posterior to the pectoral flipper insertion and girth at the caudal dorsal fin insertion was approximately 30cm, when the average long-finned pilot whales is 11cm, and missing fluke notch to anus and fluke notch to insertion measurements, so total length could not be estimated	4	no	164	210	216	NA	111	NA	321	28	54	18	NA	NA	245	NA	NA	NA	NA	NA	NA	NA	NA	NA
500230	Globicephala_macrorhynchus	Smithsonian	F	yes		4	yes	170	240	256	NA	142	NA	366	33	50	19	NA	NA	247	NA	NA	24	NA	64957.3	870185	0.779641273291783,0.779641273291783,0.779641273291783,0.952173136815378,0.952173136815378,1.00172954867388,1.00172954867388,1.00172954867388,1.00172954867388,1.00172954867388,1.00172954867388,0.820031877295512,0.820031877295512,0.820031877295512,0.820031877295512,0.820031877295512,0.820031877295512,0.820031877295512,0.820031877295512,0.820031877295512,0.820031877295512,0.820031877295512	60987.4	801927
500232	Globicephala_macrorhynchus	Smithsonian	F	yes		4	yes	188	240	252	NA	140	NA	377	35	57	20	NA	NA	250	NA	NA	26	NA	66948.5	903781	0.862191525757972,0.862191525757972,0.862191525757972,0.952173136815378,0.952173136815378,0.986077524475853,0.986077524475853,0.986077524475853,0.986077524475853,0.986077524475853,0.986077524475853,0.808482132544871,0.808482132544871,0.808482132544871,0.808482132544871,0.808482132544871,0.808482132544871,0.808482132544871,0.808482132544871,0.808482132544871,0.808482132544871,0.808482132544871	62873.4	829626
504395	Globicephala_macrorhynchus	Smithsonian	F	yes		5	no	162	214	220	NA	134	96	382	36	64.8	19.6	95	NA	260	324	128	24.5	NA	60758.1	781863	0.742952272195699,0.742952272195699,0.742952272195699,0.849021046993712,0.849021046993712,0.860861330891618,0.860861330891618,0.860861330891618,0.860861330891618,0.860861330891618,0.860861330891618,0.773832898292948,0.773832898292948,0.773832898292948,0.773832898292948,0.773832898292948,0.773832898292948,0.689462004179863,0.689462004179863,0.689462004179863,0.689462004179863,0.689462004179863	56673.8	667466
504396	Globicephala_macrorhynchus	Smithsonian	M	yes		5	no	200	260	300	NA	212	144	507	42.4	71	24.5	120	NA	350	435	170	32	NA	114085	2.0565e+06	0.917225027402098,0.917225027402098,0.917225027402098,1.03152089821666,1.03152089821666,1.17390181485221,1.17390181485221,1.17390181485221,1.17390181485221,1.17390181485221,1.17390181485221,1.22427294356795,1.22427294356795,1.22427294356795,1.22427294356795,1.22427294356795,1.22427294356795,1.0341930062698,1.0341930062698,1.0341930062698,1.0341930062698,1.0341930062698	105297	1.68961e+06
504397	Globicephala_macrorhynchus	Smithsonian	M	yes		5	no	189	240	250	NA	170	116	467	42.4	79.5	23	110	NA	304	388	168	31	NA	86026.2	1.28148e+06	0.866777650894982,0.866777650894982,0.866777650894982,0.952173136815378,0.952173136815378,0.978251512376838,0.978251512376838,0.978251512376838,0.978251512376838,0.978251512376838,0.978251512376838,0.981728303804486,0.981728303804486,0.981728303804486,0.981728303804486,0.981728303804486,0.981728303804486,0.833099921717335,0.833099921717335,0.833099921717335,0.833099921717335,0.833099921717335	81490.3	1.11447e+06
504404	Globicephala_macrorhynchus	Smithsonian	F	yes		5	no	162	210	214	NA	134	116	378	38.0	63.6	19.1	101	NA	253	317.5	129	25	NA	60943.3	775010	0.742952272195699,0.742952272195699,0.742952272195699,0.833151494713455,0.833151494713455,0.837383294594574,0.837383294594574,0.837383294594574,0.837383294594574,0.837383294594574,0.837383294594574,0.773832898292948,0.773832898292948,0.773832898292948,0.773832898292948,0.773832898292948,0.773832898292948,0.833099921717335,0.833099921717335,0.833099921717335,0.833099921717335,0.833099921717335	56476.6	647554
550423	Globicephala_macrorhynchus	Smithsonian	M	yes		5	no	166.0	224.0	224.0	NA	164.0	110.0	443.0	38.1	72.5	22.5	112.5	NA	285.5	363.25	155.5	28	NA	75407.9	1.03784e+06	0.761296772743741,0.761296772743741,0.761296772743741,0.888694927694352,0.888694927694352,0.876513355089647,0.876513355089647,0.876513355089647,0.876513355089647,0.876513355089647,0.876513355089647,0.947079069552563,0.947079069552563,0.947079069552563,0.947079069552563,0.947079069552563,0.947079069552563,0.790008546456093,0.790008546456093,0.790008546456093,0.790008546456093,0.790008546456093	71356.8	890492
550424	Globicephala_macrorhynchus	Smithsonian	M	yes		5	no	178.0	254.0	254	NA	198.0	152.0	476.0	42.0	72.5	27.0	109.0	NA	312.0	395.25	166.5	30	NA	96455.2	1.53437e+06	0.816330274387867,0.816330274387867,0.816330274387867,1.00771656979627,1.00771656979627,0.993903536574868,0.993903536574868,0.993903536574868,0.993903536574868,0.993903536574868,0.993903536574868,1.14342473031346,1.14342473031346,1.14342473031346,1.14342473031346,1.14342473031346,1.14342473031346,1.14342473031346,1.14342473031346,1.14342473031346,1.14342473031346,1.14342473031346	90608.1	1.28139e+06
550438	Globicephala_macrorhynchus	Smithsonian	M	yes		5	no	200	286	286	NA	192	134	477	40.5	75	25.9	99	NA	315.3	396.8	163	30.5	NA	100444	1.68997e+06	0.917225027402098,0.917225027402098,0.917225027402098,1.13467298803832,1.13467298803832,1.1191197301591,1.1191197301591,1.1191197301591,1.1191197301591,1.1191197301591,1.1191197301591,1.10877549606154,1.10877549606154,1.10877549606154,1.10877549606154,1.10877549606154,1.10877549606154,0.962374047501059,0.962374047501059,0.962374047501059,0.962374047501059,0.962374047501059	94712.9	1.46623e+06
Supplementary Table 1.	Complete dataset of individuals used in analyses to examine differences in surface area (SA) and volume (V) estimates made using the truncated cones method and the 3D model method. Columns I through N represent girth measurements, column O is total length from snout to fluke notch, and columns P through Y are length measurements used to determine cone height in the truncated cones method calculat…
